# Supplementary material for: Neutralizing antibody titres to SARS-CoV-2 Omicron variant and wild-type virus in those with past infection or vaccinated or boosted with mRNA BNT162b2 or inactivated CoronaVac vaccines
Source: PubMed Central journal article supplement (PMC8750710; doi:10.21203/rs.3.rs-1207071/v1), 2022-01-05

**A****Wild Type**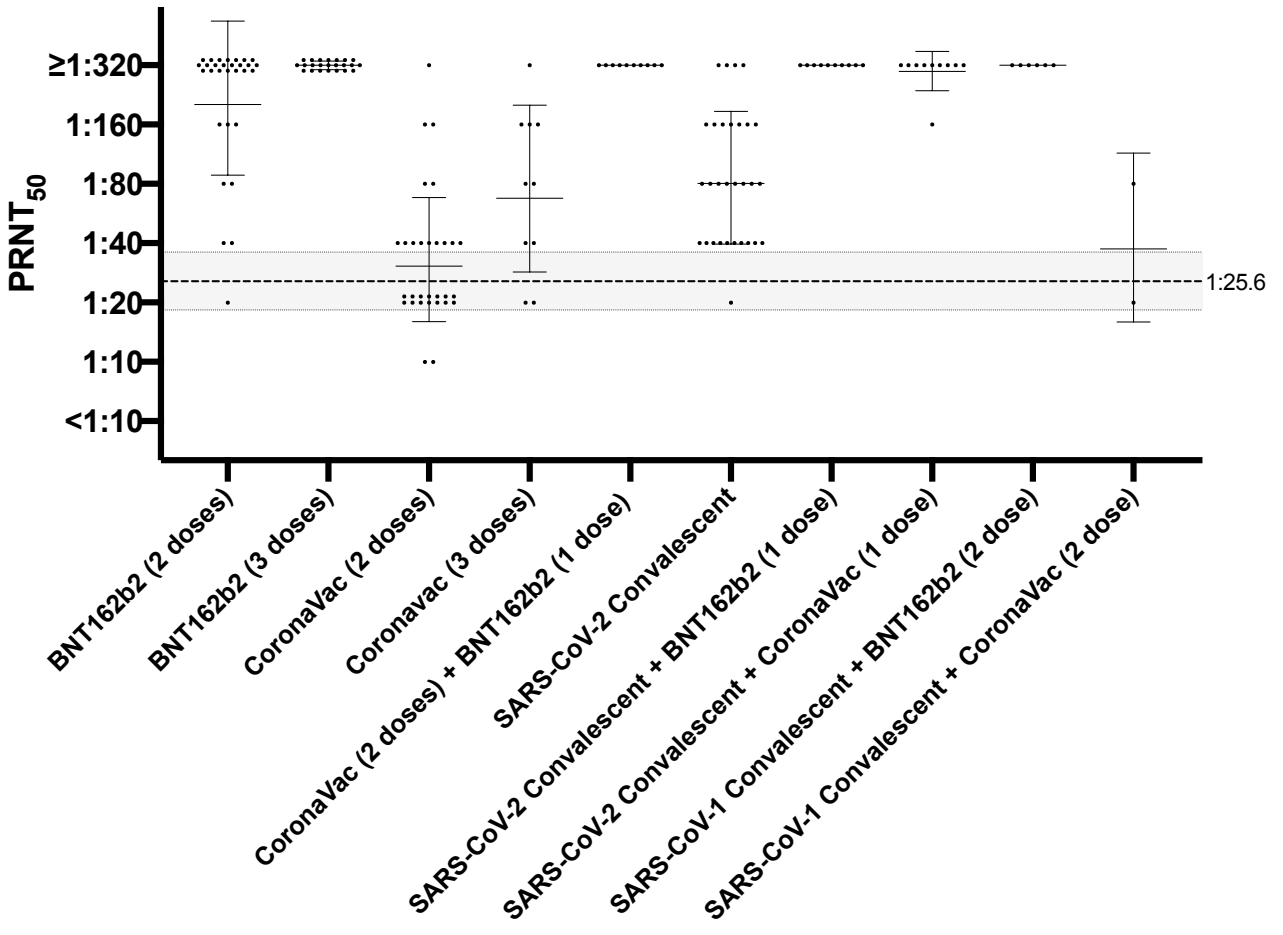**B****Omicron**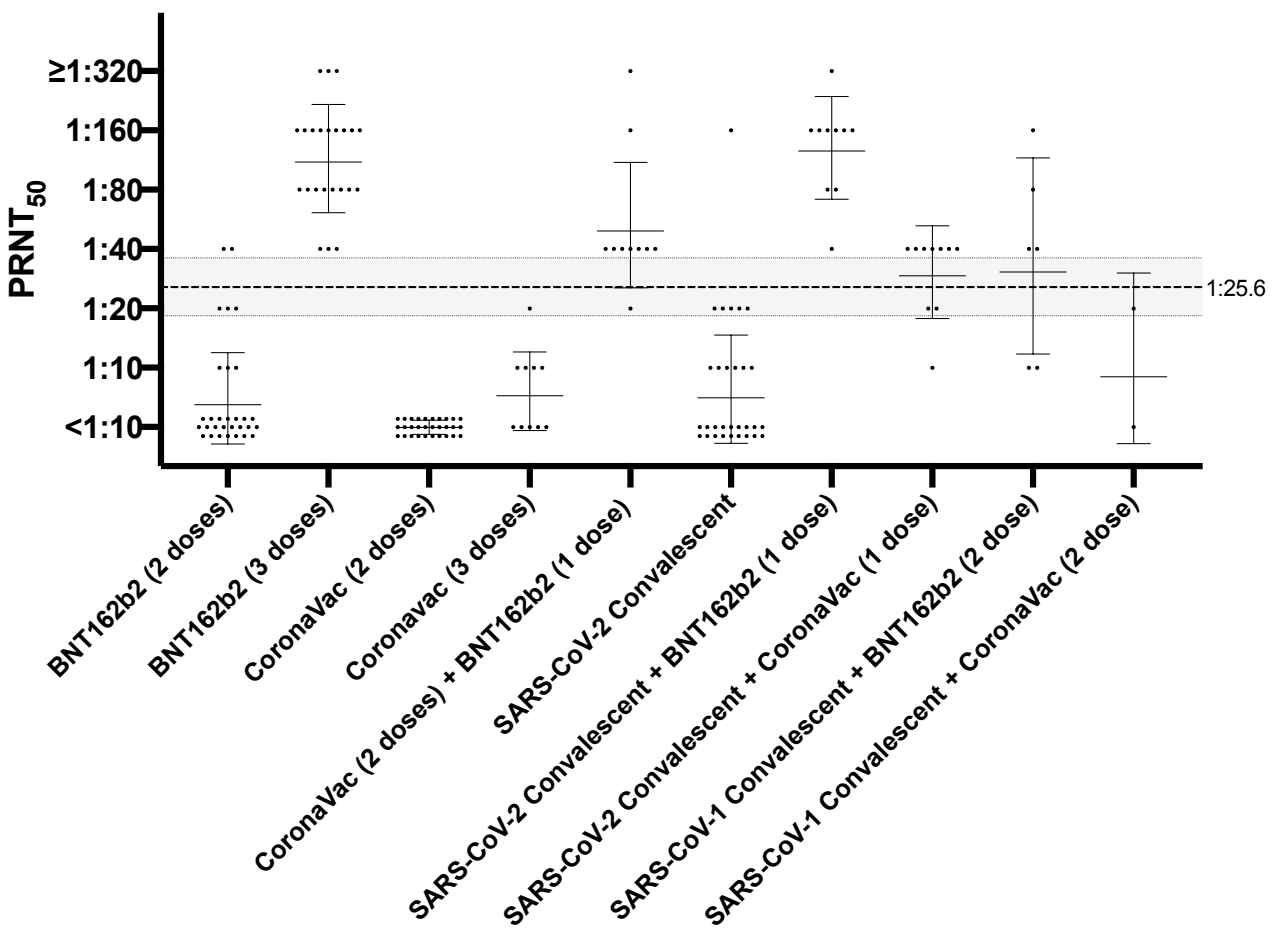

Supplement: 9b75af0b151f01e2a12aacb6.pdf [file 9b75af0b151f01e2a12aacb6.pdf]
