# Supplementary material for: Neutralizing antibody titres to SARS-CoV-2 Omicron variant and wild-type virus in those with past infection or vaccinated or boosted with mRNA BNT162b2 or inactivated CoronaVac vaccines
Source: PubMed Central journal article supplement (PMC8750710; doi:10.21203/rs.3.rs-1207071/v1), 2022-01-05

**A**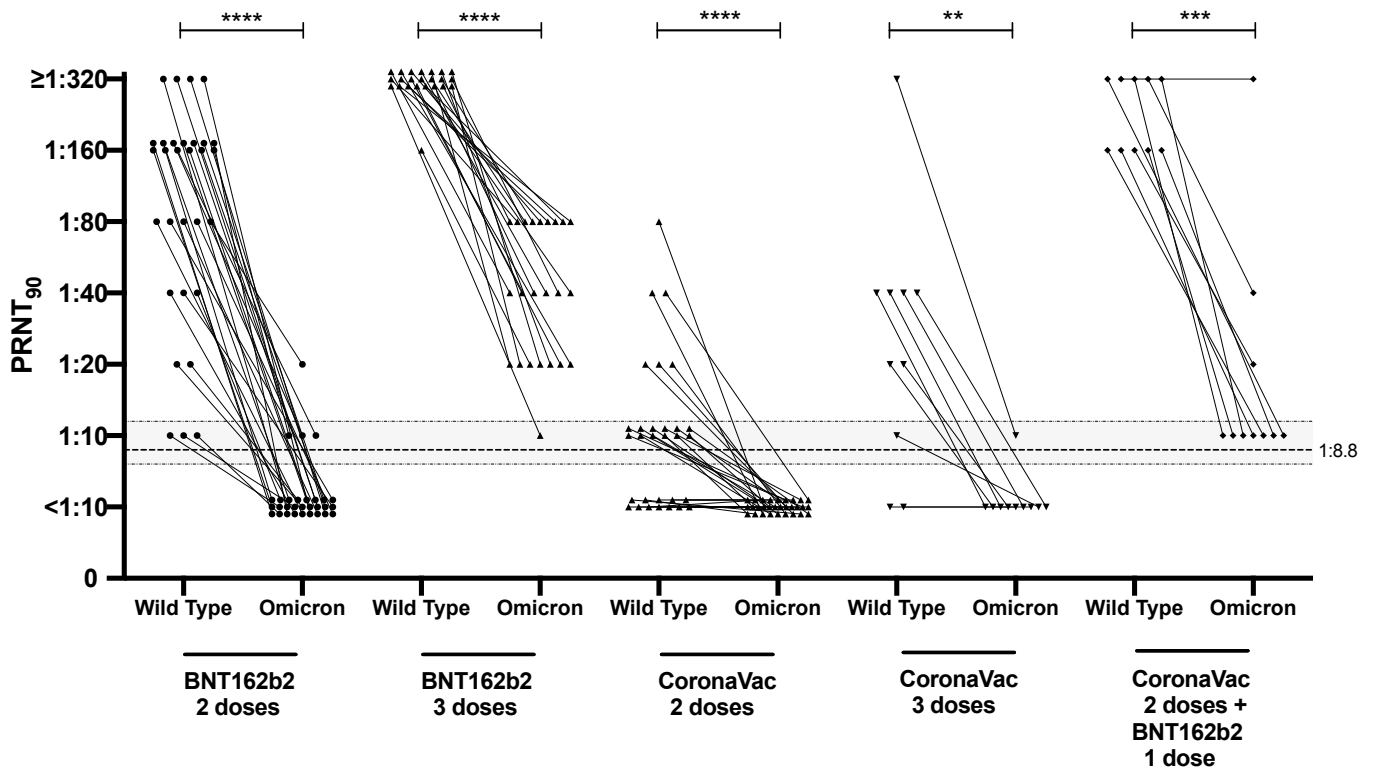**B**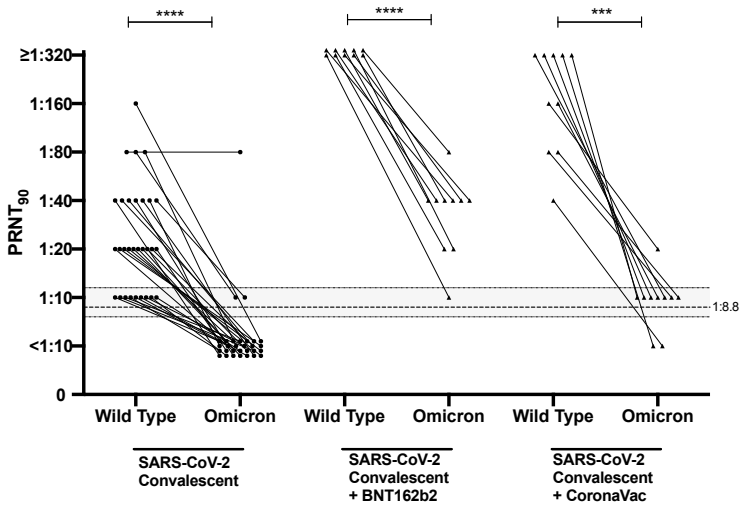**C**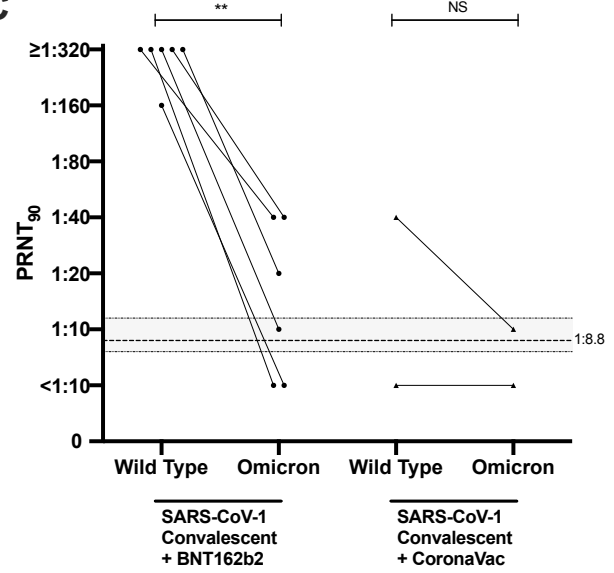**D**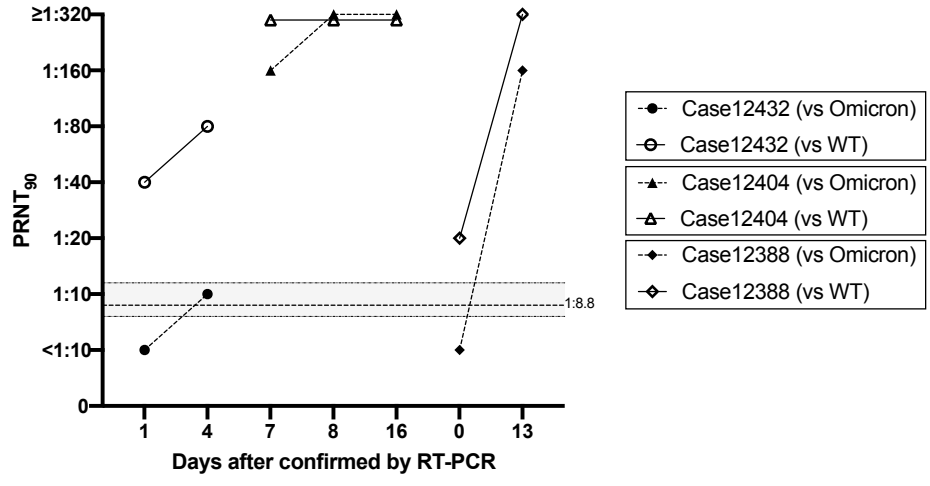

Supplement: 284f6cd7c6b7055c3a1abe45.pdf [file 284f6cd7c6b7055c3a1abe45.pdf]
